# Supplementary material for: Synthesis and characterization of palladium(ii) complexes with a novel chelating iminocarbene ligand
Source: Royal Society of Chemistry journal article supplement (doi:10.1039/b308275j), 2003-01-01
Supplement: b308275j.pdf [file b308275j.pdf]

## Synthesis and Characterization of Palladium(II) Complexes with a Novel Chelating Iminocarbene Ligand

Morten Frøseth, Ajaib Dhindsa, Hilde Røise, and Mats Tilstet

### Supplementary material

**(C–N)PdCl<sub>2</sub> (4a).** <sup>1</sup>H NMR (DMSO-*d*<sub>6</sub>, 200 MHz, 25°C): Two species were seen in a 1:2 ratio. Data for major species,  $\kappa^1$ -**4a**:  $\delta$  7.52 (s, 1H, HC=CH, nearest N-Me by NOESY), 7.33 (s, 1H, HC=CH, nearest imine-Me), 7.05 (m, 3H, aryl-*H*), 5.46 (s, 2H, CH<sub>2</sub>), 4.00 (s, 3H, NCH<sub>3</sub>), 2.75 (septet, *J* = 6.8 Hz, 2H, CHMe<sub>2</sub>), 1.73 (s, 3H, MeC=N), 1.11-1.02 (br m, 12H, CH(CH<sub>3</sub>)<sub>2</sub>). Minor species, **4a**  $\kappa^2$ :  $\delta$  7.58 (s, 1H, HC=CH, nearest imine-Me), 7.41 (s, 1H, HC=CH, nearest N-Me), 5.32 (s, 2H, CH<sub>2</sub>), 3.93 (s, 3H, NCH<sub>3</sub>), 2.75 (septet, *J* = 6.8 Hz, 2H, CHMe<sub>2</sub>), 2.04 (s, 3H, MeC=N), 1.49 (d, *J* = 6.8 Hz, 6H, CH(CH<sub>3</sub>)<sub>2</sub>), 0.84 (d, *J* = 6.8 Hz, 6H, CH(CH<sub>3</sub>)<sub>2</sub>).

**(C–N)PdClMe (4b).** <sup>1</sup>H NMR (THF-*d*<sub>8</sub>, 300 MHz, –60°C): four species were seen in a ca. 1:1:1:1 ratio. When fully or partially resolvable, signals for the same groups in the four species are listed as a series enclosed in brackets. Otherwise, signals are overlapping extensively.  $\delta$  7.25 (m, 5H, aryl-*H* and HC=CH), 5.71 (m, 1H, CH<sub>2</sub>, overlapping signals for all species), 5.34 (m, 1H, CH<sub>2</sub>), [4.07, 4.03, 4.02 and 3.97] (four s, 3H, N-CH<sub>3</sub>), 2.82 (m, 2H, CHMe<sub>2</sub>), [1.85, 1.79, 1.78 and 1.75] (four s, 3H, MeC=N for four species), 1.1 (m, 12H, CH(CH<sub>3</sub>)<sub>2</sub>), [0.30, 0.28, 0.27 and 0.27] (four s, 3H, Pd-CH<sub>3</sub>). <sup>13</sup>C {<sup>1</sup>H} NMR (THF-*d*<sub>8</sub>, 75 MHz, –20°C)  $\delta$  [174.43, 174.39, 174.25 and 174.18] (NCN), [167.73, 167.66, 167.60 and 167.55] (C=N), 146.52 (aryl-C<sub>ipso</sub>), [136.68, 136.65, 136.57 and 136.51] (aryl-C<sub>o</sub>), 124.21 (aryl-C<sub>p</sub>), 123.50 (aryl-C<sub>m</sub>), 123.36 (HC=CH), [122.28, 122.18 122.17 and 122.09] (HC=CH), 58.42 (CH<sub>2</sub>), [38.21 and 38.14] (NCH<sub>3</sub>), [28.71 and 28.56] (CHMe<sub>2</sub>), 23.54 (m, CH(CH<sub>3</sub>)<sub>2</sub>), [18.94, 18.93, 18.86 and 18.75] (CH<sub>3</sub>C=N), [–8.32, –8.47, –8.74 and –8.84] (Pd-CH<sub>3</sub>).

**(C–N)PdCl(MeCN)<sup>+</sup>PF<sub>6</sub><sup>–</sup> (5a).** <sup>1</sup>H NMR (CD<sub>3</sub>NO<sub>2</sub>, 300 MHz, 25°C)  $\delta$  7.39 (br, 3H, aryl-*H*), 7.33 (br, 1H, HC=CH nearest imine-Me), 7.18 (br, 1H, HC=CH nearest N-Me), 5.39 (br s, 2H, CH<sub>2</sub>), 4.07 and 3.55 (br, 3H, NCH<sub>3</sub>), 2.73 (br, 2H, CHMe<sub>2</sub>), 2.33 (br s, 3H, CH<sub>3</sub>C=N), 1.53 (br d, *J* = 6.1 Hz, 6H, CH(CH<sub>3</sub>)<sub>2</sub>), 1.05 (br d, *J* = 6.1 Hz, 6H, CH(CH<sub>3</sub>)<sub>2</sub>). <sup>13</sup>C {<sup>1</sup>H} NMR (CD<sub>3</sub>NO<sub>2</sub>, 50 MHz, 25°C)  $\delta$  181.5, 143.9, 141.8, 129.0, 125.3, 125.1, 123.0,

57.68 (CH<sub>2</sub>), 38.78 (N-CH<sub>3</sub>), 29.69 (CHMe<sub>2</sub>), 26.10 (CH<sub>3</sub>C=N), 25.20 and 24.09 (CH(CH<sub>3</sub>)<sub>2</sub>); one quaternary carbon is not observed. Complete assignment of the spectrum was not possible, presumably due to dynamic line broadening. HRMS (ES): *m/z* 479.1182 (100%, M<sup>+</sup>) (calcd 479.1188), 438.1 (50%, M<sup>+</sup>-MeCN). Anal. Calcd. for C<sub>21</sub>H<sub>30</sub>ClF<sub>6</sub>N<sub>4</sub>PPd: C, 40.34; H, 4.84; Cl, 5.67; N, 8.96; P, 4.95. Found: C, 39.57; H, 4.97; Cl, 6.65; N, 9.80; P, 4.02. IR (CH<sub>2</sub>Cl<sub>2</sub>)  $\nu_{C=N}$  1638 cm<sup>-1</sup>.

<sup>1</sup>H NMR (CD<sub>3</sub>NO<sub>2</sub>, 200 MHz, -10°C): Two species were seen in a ca. 5:2 ratio. Data for major species:  $\delta$  7.38 (m, 3H, aryl-*H*), 7.37 (s, 1H, HC=CH near imine-Me), 7.25 (s, 1H, HC=CH near N-Me), 5.39 (s, 2H, CH<sub>2</sub>), 4.05 (s, 3H, NCH<sub>3</sub>), 2.79 (septet, 2H, CHMe<sub>2</sub>), 2.37 (s, 3H, CH<sub>3</sub>C=N), 1.51 (d, *J* = 6.6 Hz, 6H, CH(CH<sub>3</sub>)<sub>2</sub>) 1.08 (d, *J* = 6.6 Hz, 6H, CH(CH<sub>3</sub>)<sub>2</sub>). Minor species:  $\delta$  7.38 (m, 3H, aryl-*H*), 7.20 (s, 1H, HC=CH near imine-Me), 7.16 (s, 1H, HC=CH near N-Me), 5.39 (s, 2H, CH<sub>2</sub>), 3.39 (br s, 3H, NCH<sub>3</sub>), 2.69 (septet, 2H, CHMe<sub>2</sub>), 2.18 (s, 3H, CH<sub>3</sub>C=N), 1.52 (br, 6H, CH(CH<sub>3</sub>)<sub>2</sub>), 1.02 (d, *J* = 6.2 Hz, 6H, CH(CH<sub>3</sub>)<sub>2</sub>).

**(N-C)PdMe(MeCN)<sup>+</sup>PF<sub>6</sub><sup>-</sup> (5b).** <sup>1</sup>H NMR (CD<sub>3</sub>NO<sub>2</sub>, 200 MHz, 25°C)  $\delta$  7.34 (d, *J* = 1.9 Hz, 1H, HC=CH near imine-Me), 7.30 (m, 3H, aryl-*H*), 7.22 (d, *J* = 1.9 Hz, 1H, HC=CH near N-Me), 5.17 (s, 2H, CH<sub>2</sub>), 3.84 (s, 3H, NCH<sub>3</sub>), 2.71 (septet, *J* = 6.7 Hz, 2H, CHMe<sub>2</sub>), 2.14 (s, 3H, CH<sub>3</sub>C=N), 1.36 (d, *J* = 6.7 Hz, 6H, CH(CH<sub>3</sub>)<sub>2</sub>), 1.05 (d, *J* = 6.7 Hz, 6H, CH(CH<sub>3</sub>)<sub>2</sub>), 0.60 (s, 3H, PdCH<sub>3</sub>). <sup>13</sup>C{<sup>1</sup>H} NMR (CD<sub>3</sub>NO<sub>2</sub>, 50 MHz, 25°C)  $\delta$  177.4 (NCN), 167.1 (N=C), 143.9 (aryl-C<sub>ipso</sub>), 140.1 (aryl-C<sub>o</sub>), 128.0 (aryl-C<sub>p</sub>), 125.3 (aryl-C<sub>m</sub>), 124.5 and 123.7 (HC=CH), 56.93 (CH<sub>2</sub>), 38.44 (NCH<sub>3</sub>), 29.36 (CHMe<sub>2</sub>), 24.42 and 24.13 (CH(CH<sub>3</sub>)<sub>2</sub>), 24.25 (CH<sub>3</sub>C=N), -10.93 (PdCH<sub>3</sub>). IR (CH<sub>2</sub>Cl<sub>2</sub>)  $\nu_{C=N}$  1651 cm<sup>-1</sup>. MS (ES) *m/z* 459.2 (30%, M<sup>+</sup>), 418.1 (20%, M<sup>+</sup>-MeCN), 402.1 (100%, M<sup>+</sup>-MeCN-Me). Anal. Calcd for C<sub>22</sub>H<sub>33</sub>F<sub>6</sub>N<sub>4</sub>PPd: C, 43.68; H, 5.50; N, 9.26; P, 5.12. Found: C, 45.56; H, 5.59; N, 9.01; P, 5.05.

**[(N-C)Pd(MeCN)<sub>2</sub>]<sup>2+</sup>(PF<sub>6</sub><sup>-</sup>)<sub>2</sub> (6a).** <sup>1</sup>H NMR (CD<sub>3</sub>NO<sub>2</sub>, 200 MHz, 25°C)  $\delta$  7.48 (d, *J* = 1.9 Hz, 1H, HC=CH near imine-Me), 7.41 (m, 3H, aryl-*H*), 7.35 (d, *J* = 1.9 Hz, 1H, HC=CH near N-Me), 5.50 (s, 2H, CH<sub>2</sub>), 4.04 (s, 3H, NCH<sub>3</sub>), 2.78 (septet, *J* = 6.7 Hz, 2H, CHMe<sub>2</sub>), 2.53 (br s, 3H, CH<sub>3</sub>C=N), 2.44 (s, 3H, NCH<sub>3</sub>), 1.53 (d, *J* = 6.7 Hz, 6H, CH(CH<sub>3</sub>)<sub>2</sub>), 1.12 (d, *J* = 6.7 Hz, 6H, CH(CH<sub>3</sub>)<sub>2</sub>). <sup>13</sup>C{<sup>1</sup>H} NMR (CD<sub>3</sub>NO<sub>2</sub>, 50 MHz, 25°C)  $\delta$  185.9 (NCN), 141.9 (aryl-C<sub>o</sub>), 139.5 (aryl-C<sub>ipso</sub>), 130.9 (aryl-C<sub>p</sub>), 126.8 (HC=CH near N-Me), 126.3 (aryl-C<sub>m</sub>), 124.9 (HC=CH near imine-Me), 57.27 (CH<sub>2</sub>), 38.95 (NCH<sub>3</sub>), 29.69 (CHMe<sub>2</sub>), 25.96 (CH<sub>3</sub>C=N), 24.31 and 24.21 (CH(CH<sub>3</sub>)<sub>2</sub>). The imine-C was not observed. IR (CH<sub>2</sub>Cl<sub>2</sub>)  $\nu_{C=N}$  1639 cm<sup>-1</sup>. Anal. Calcd for C<sub>23</sub>H<sub>33</sub>F<sub>12</sub>N<sub>5</sub>P<sub>2</sub>Pd: C, 35.60; H, 4.29; N, 9.03. Found: C, 34.63; H, 4.35; N, 8.81.
